# Supplementary material for: Healthcare Professionals’ Willingness-to-Pay and Preferences for Covid-19 Vaccines in a Nigerian Tertiary Hospital: A Cross-Sectional Study
Source: Research Square preprint supplement (doi:10.21203/rs.3.rs-6470613/v1), 2025-06-02
Supplement: Supplementary file 1 [file 390a8cd97ff56cc233864b8a.pdf]

## COVID 19 VACCINES

This questionnaire is to obtain your responses concerning Covid-19 vaccines. Your responses will be treated with utmost confidentiality and will be used for research purposes only.

### Section A:

Gender: Male ☐ Female ☐ Age; 25-34 ☐ 35-44 ☐ 45-54 ☐ 55-64 ☐ ≥65 ☐

Marital Status: Married ☐ Single ☐ Others ☐

Profession: Doctor ☐ Pharmacist ☐ Nurse ☐

Have you had Covid-19? Yes ☐ No ☐

Have you treated a patient who had Covid-19? Yes ☐ No ☐

Have you been hospitalized for Covid-19? Yes ☐ No ☐

Have you cared for a relative who had Covid-19? Yes ☐ No ☐

Do you have health insurance? Yes ☐ No ☐

Do you believe the available Covid-19 vaccines can protect against the infection? Yes ☐ No ☐

### Section B:

VACCINE A : Has 95% efficacy. Given in two doses separated by 3-12 weeks. Stored at a temperature of -80°C and -60°C. Suitable for individuals 16 years and above. Has side effects of pain, redness and swelling at the site of injection; tiredness, headaches, muscle pain, chills, fever and nausea. Write how much you are willing to pay for the two doses of this vaccine.....

VACCINE B: Has 95% efficacy. Given as two doses, separated by 4 weeks. Stored at a temperature of -50°C and -15°C. Used in individuals 18 years and above. Causes pain, redness and swelling at the site of administration; it also causes tiredness, headaches, muscle pain, chills, fever and nausea. Write the amount you are willing to pay for the two doses of this vaccine.....

VACCINE C: Has 66% efficacy. Given as a single dose. Stored at a temperature of 2°C and 8°C. Used in individuals 18 years and above. It causes pain, redness and swelling at the site of administration; it also causes tiredness, headaches, muscle pain, chills, fever and nausea. How much are you willing to pay for the two doses of this vaccine.....

VACCINE D: Has 70% efficacy. Given in two doses at an interval of 8-12 weeks. Stored at a temperature of 2°C and 8°C. Suitable for individuals 18 years and above. It has side effects of blood clots, low platelet count, headaches, fatigue, muscle or joint pain, fever, chills and nausea. State the amount you are willing to pay for this vaccine.....

Which one of these vaccines do you prefer? A ☐ B ☐ C ☐ D ☐

Thank you for your time.
